# Supplementary material
Source: HighWire-hosted journal article supplement (https://cmaj.ca/highwire/filestream/146579/field_highwire_adjunct_files/8/211881-res-9-at.pdf)
Supplement: 211881-res-9-at.pdf [file 211881-res-9-at.pdf]

A)

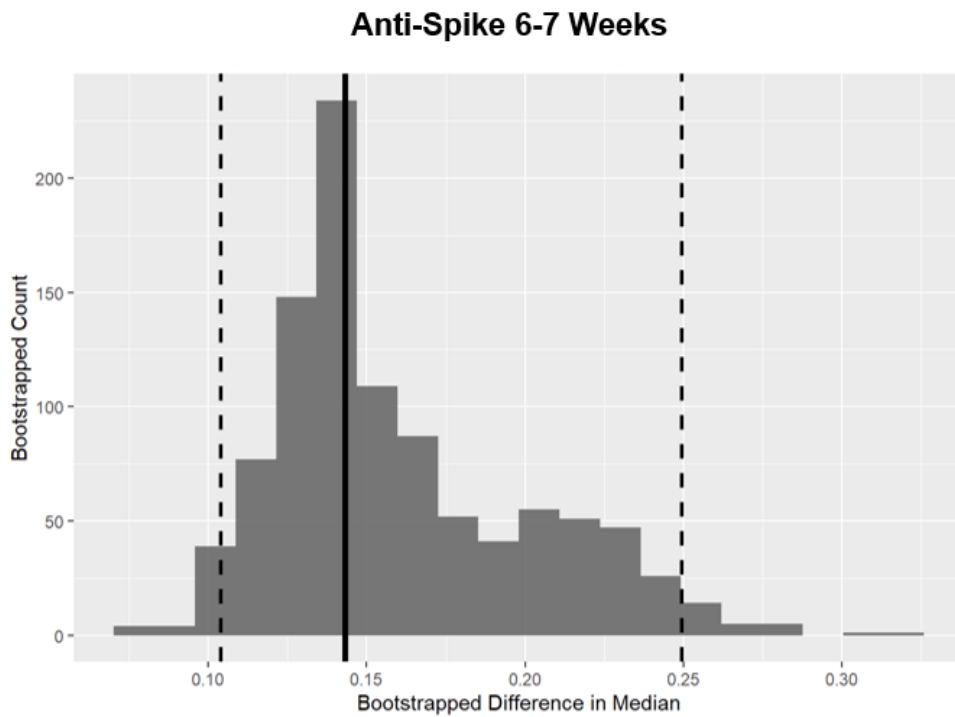

B)

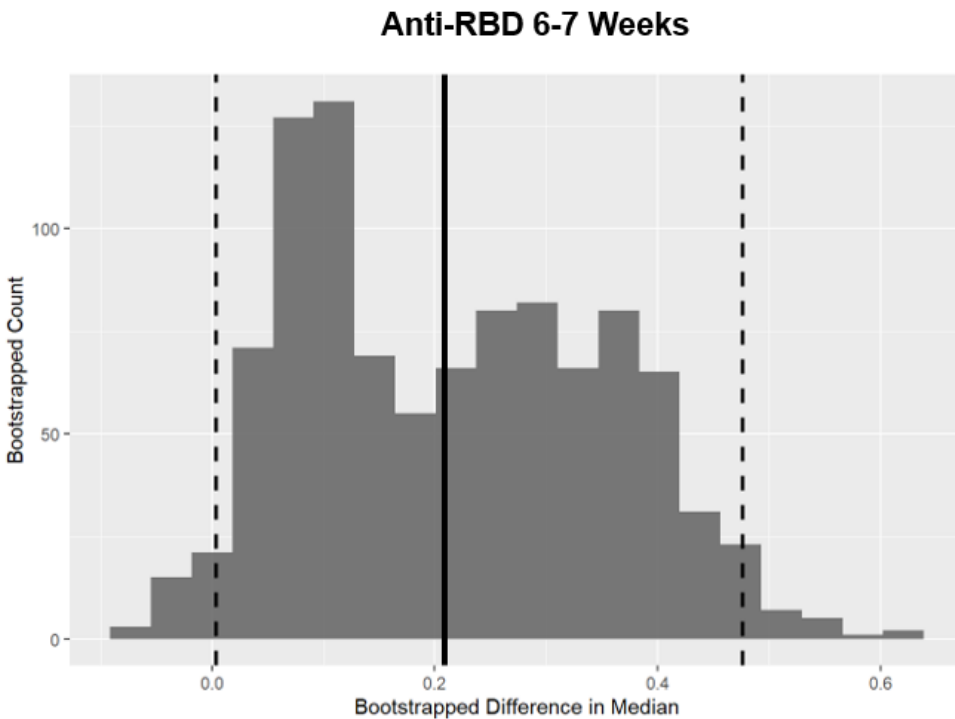

Appendix 9, as supplied by the authors. Appendix to: Yau K, Chan CT, Abe KT, et al. Differences in mRNA-1273 (Moderna) and BNT162b2 (Pfizer-BioNTech) SARS-CoV-2 vaccine immunogenicity among patients undergoing dialysis. *CMAJ* 2022. doi: 10.1503/cmaj.211881. Copyright © 2022 The Author(s) or their employer(s). To receive this resource in an accessible format, please contact us at [cmajgroup@cmaj.ca](mailto:cmajgroup@cmaj.ca).

C)

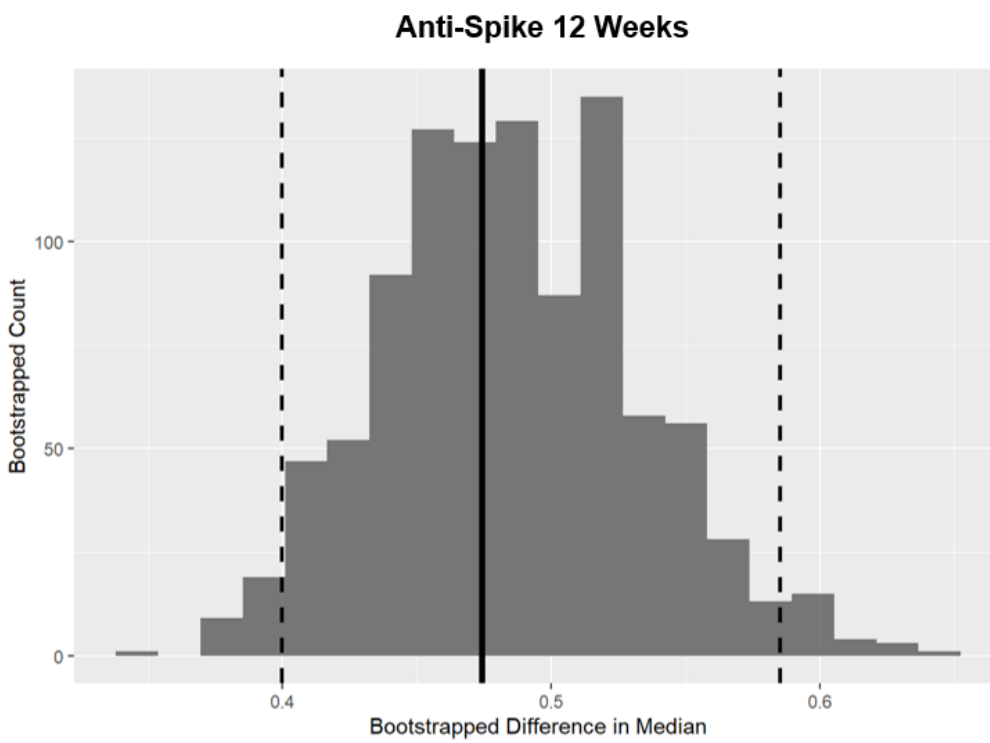

D)

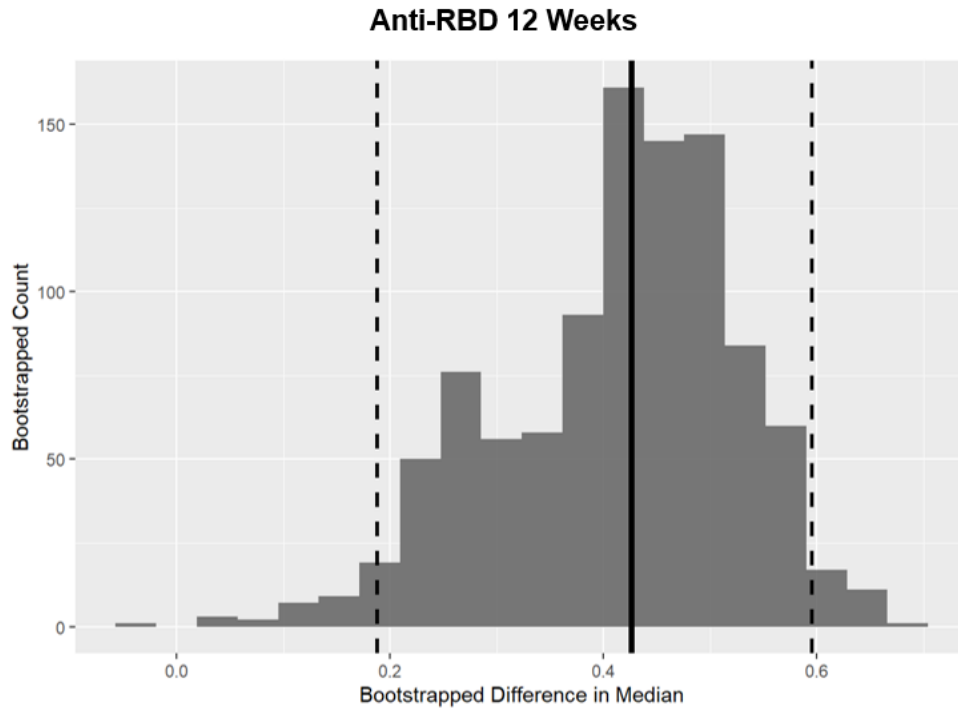

**Supplementary Appendix 9:** Bootstrapped median difference in SARS-CoV-2 antibody levels (mRNA-1273 minus BNT162b2) for (A) anti-Spike 6-7 weeks (B) anti-RBD 6-7 weeks (C) anti-Spike 12 weeks (D) anti-RBD 12 weeks after second dose.

NOTE: 95% confidence intervals are indicated in dashed lines.
